# Supplementary material for: Antibiotic Resistance Among Pediatric-Sourced Ocular Pathogens: 8-Year Findings From the Antibiotic Resistance Monitoring in Ocular Microorganisms (ARMOR) Surveillance Study
Source: PubMed Central journal article supplement — Pediatr Infect Dis J. 2019 Jan 11;38(2):138–45. doi: 10.1097/INF.0000000000002206 (PMC6343952; doi:10.1097/inf.0000000000002206), 2019-01-11
Supplement: inf-38-138-s001.pdf [file inf-38-138-s001.pdf]

**Additional File 1.** Minimum inhibitory concentrations and resistance profiles for *Pseudomonas aeruginosa* isolates from ocular infections in pediatric patients aged 0 to 17 years

| Antibacterial | N <sup>o</sup> | Range       | <u>MIC (µg/mL)</u> |                   | <u>Resistance Profile</u> |      |     |
|---------------|----------------|-------------|--------------------|-------------------|---------------------------|------|-----|
|               |                |             | MIC <sub>50</sub>  | MIC <sub>90</sub> | %S                        | %I   | %R  |
| Ofloxacin     | 39             | 0.06 to 2   | 0.5                | 2                 | 100                       | 0    | 0   |
| Ciprofloxacin | 62             | 0.008 to 1  | 0.12               | 0.25              | 100                       | 0    | 0   |
| Levofloxacin  | 39             | 0.03 to 1   | 0.25               | 1                 | 100                       | 0    | 0   |
| Gatifloxacin  | 39             | 0.03 to 1   | 0.5                | 1                 | 100                       | 0    | 0   |
| Moxifloxacin  | 62             | 0.06 to 8   | 1                  | 2                 | NA                        | NA   | NA  |
| Besifloxacin  | 62             | 0.06 to 8   | 1                  | 2                 | NA                        | NA   | NA  |
| Tobramycin    | 62             | 0.25 to 256 | 0.5                | 1                 | 96.8                      | 0    | 3.2 |
| Imipenem      | 52             | ≤0.5 to 16  | 1                  | 4                 | 80.8                      | 11.5 | 7.7 |
| Polymyxin B   | 39             | 1 to 4      | 1                  | 2                 | 97.4                      | 2.6  | 0   |

Abbreviations: MIC, minimum inhibitory concentration; N<sup>o</sup>, number of isolates tested; MIC<sub>50</sub>, minimum inhibitory concentration that inhibits visible growth of 50% of isolates; MIC<sub>90</sub>, minimum inhibitory concentration that inhibits visible growth of 90% of isolates; S, susceptible; I, intermediate; R, resistant; NA, Clinical and Laboratory Standards Institute interpretive breakpoints not available.

Percentages may not equal 100 due to rounding.
